# Supplementary material for: A new diastereoselective aza-allyl conjugate addition–Michael addition–ring closure reaction sequence and its application in the construction of six contiguous stereogenic centres
Source: Royal Society of Chemistry journal article supplement (doi:10.1039/b707707f), 2007-01-01
Supplement: b707707f.pdf [file b707707f.pdf]

**Electronic Supplementary Information**

**A New Diastereoselective Aza-Allyl – Michael Addition – Ring Closure  
Reaction Sequence and its Application in the Construction of Six  
Contiguous Stereogenic Centres**

Magdaline Minopoulos,<sup>a</sup> Philip C. Andrews,<sup>a</sup> Steven D. Bull,<sup>b</sup> Benjamin H. Fraser,<sup>a</sup> and  
Paul Jensen<sup>c</sup>

<sup>a</sup> *School of Chemistry, Monash University, Clayton, Melbourne, Vic 3800, Australia*

<sup>b</sup> *Department of Chemistry, University of Bath, BA2 7AY, UK.*

<sup>c</sup> *School of Chemistry, University of Sydney, NSW 2006, Australia.*

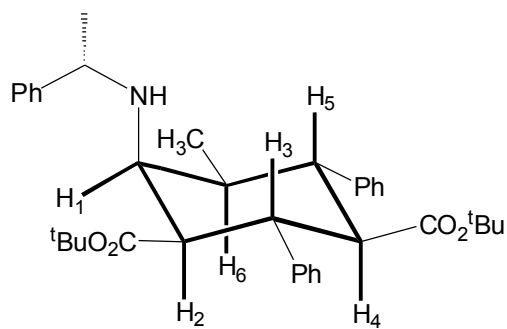

**2**

### Coupling constants

$$J_{(H1-H6)} = 3.2 \text{ Hz}$$

$$J_{(H1-H2)} = 3.2 \text{ Hz}$$

$$J_{(H2-H3)} = 11.5 \text{ Hz}$$

$$J_{(H3-H4)} = 11.5 \text{ Hz}$$

$$J_{(H4-H5)} = 11.6 \text{ Hz}$$

$$J_{(H5-H6)} = 11.6 \text{ Hz}$$

**Supporting Figure 1:** Coupling constants used in aiding assignment of the relative stereochemistry of the cyclohexyl substituents of aminocyclohexane 2.

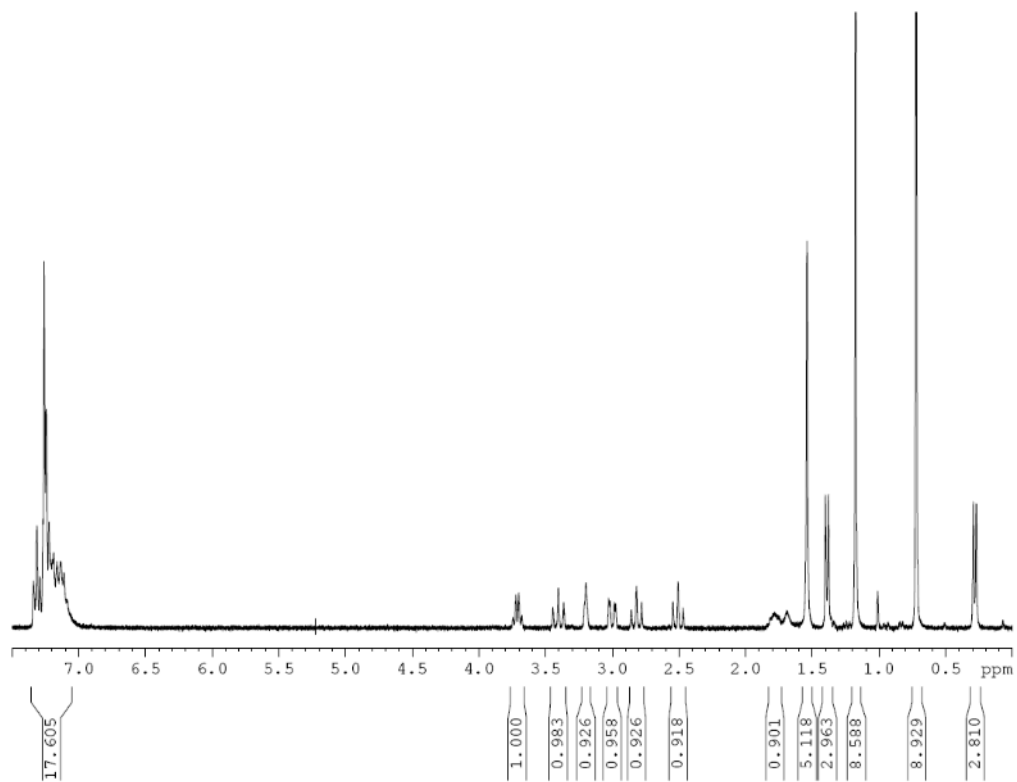

**Supporting Figure 2:** <sup>1</sup>H-NMR spectrum of aminocyclohexane 2.

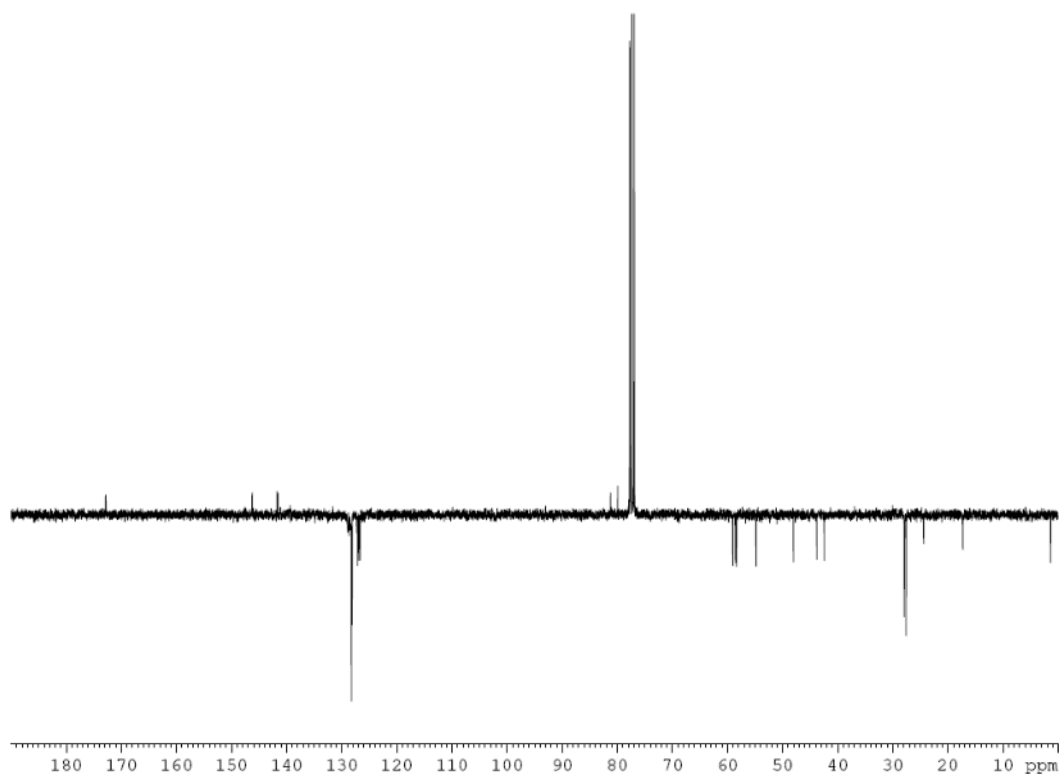

**Supporting Figure 3:**  $^{13}\text{C}$ -NMR spectrum of aminocyclohexane 2.

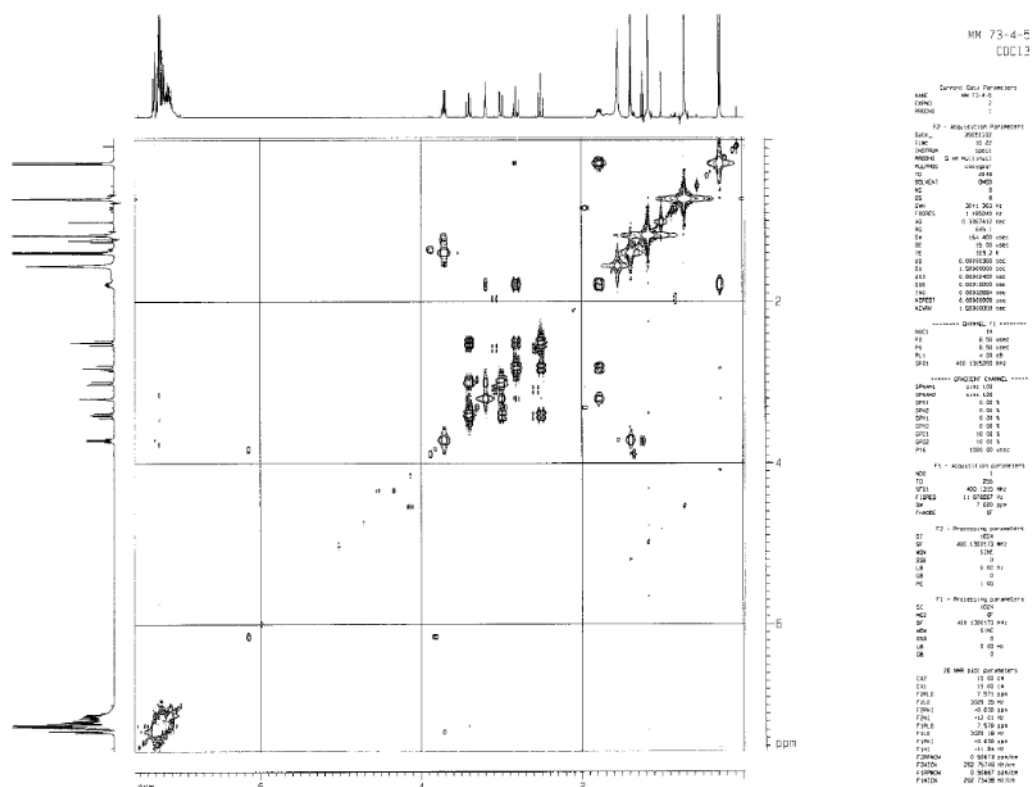

Supporting Figure 4:  $^1\text{H}$ - $^1\text{H}$  COSY spectrum of aminocyclohexane 2.

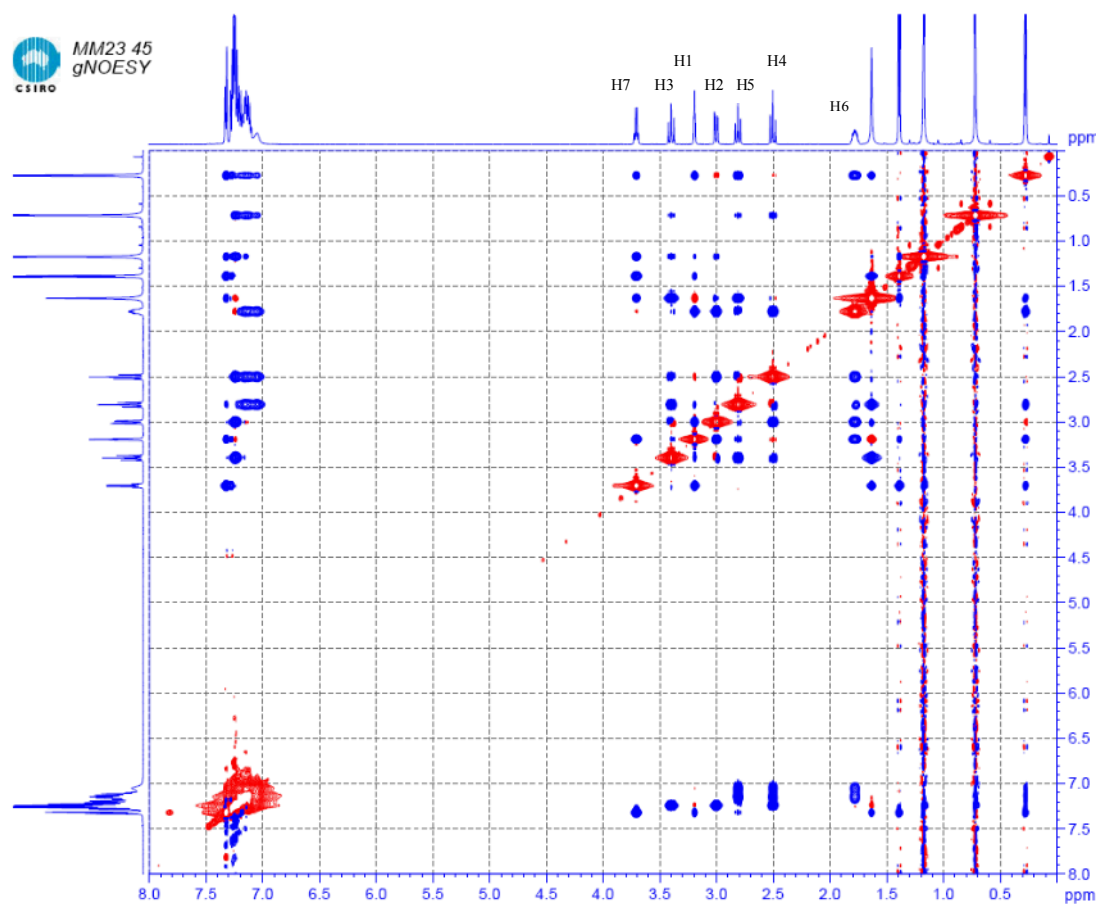

**Supporting Figure 5:**  $^1\text{H}$ - $^1\text{H}$  NOESY spectrum used in aiding determination of the relative stereochemistry of the cyclohexyl ring substituents of aminocyclohexane **2**

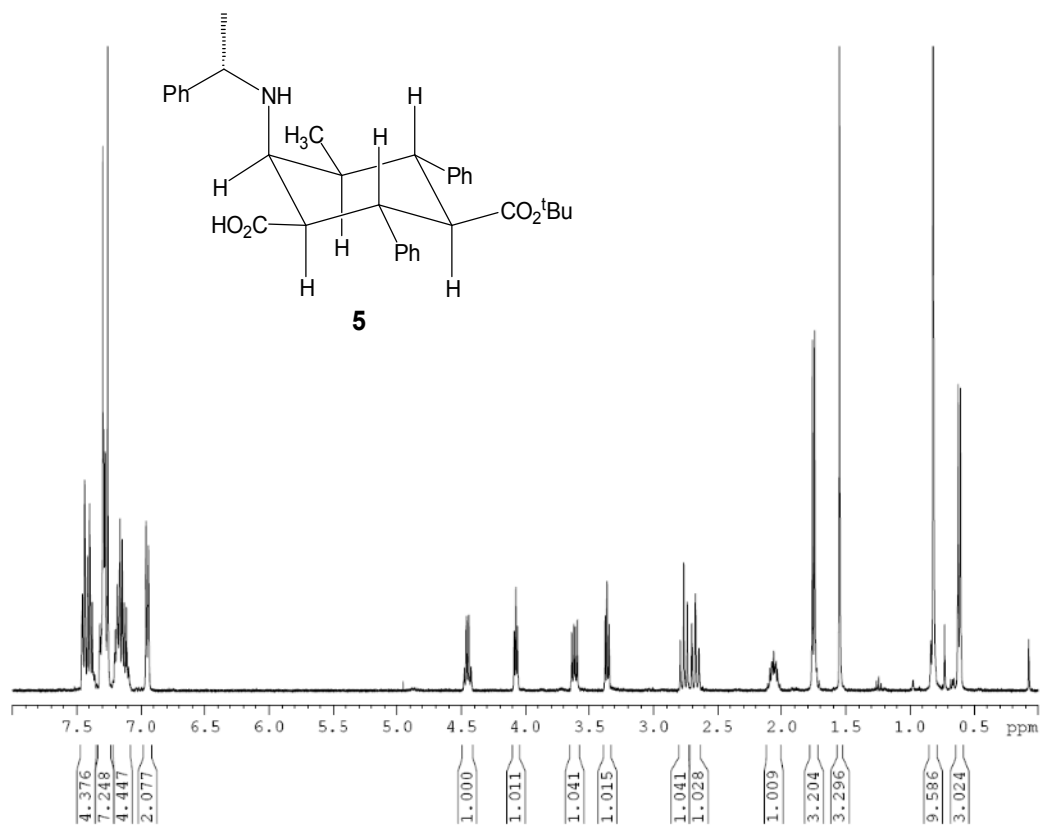

**Supporting Figure 6:**  $^1\text{H-NMR}$  spectrum of mono-*tert*-butyl ester **5**.

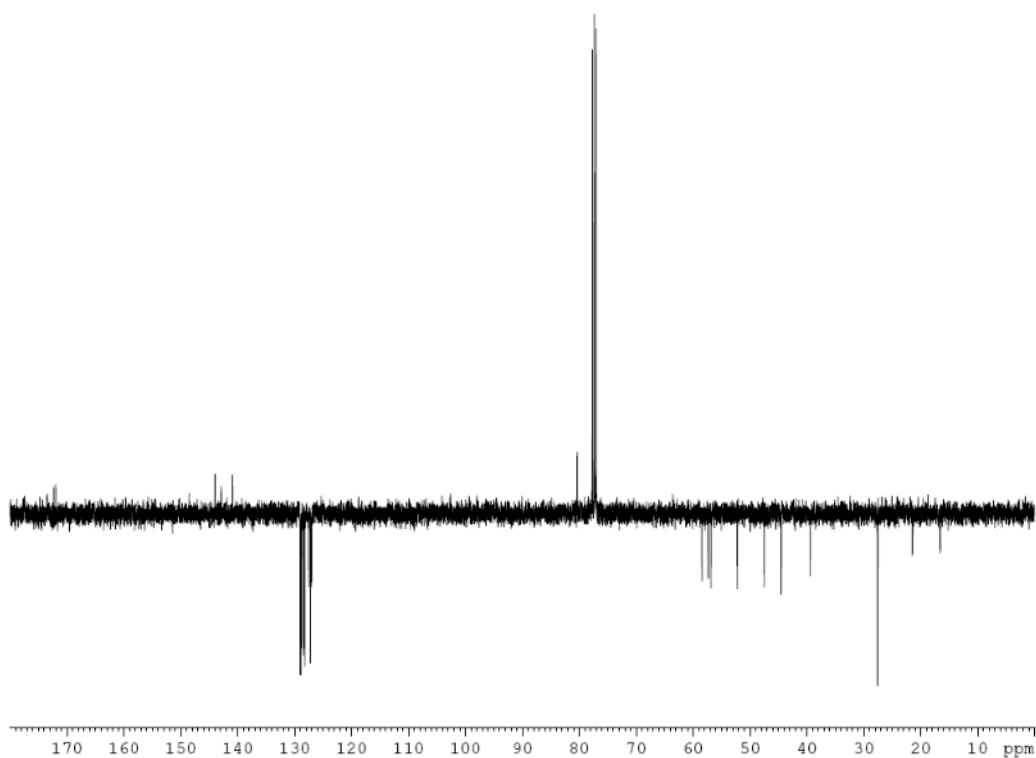

**Supporting Figure 7:**  $^{13}\text{C}$ -NMR spectrum of mono-*tert*-butyl ester **5**.
